# Supplementary material
Source: MDPI journal article supplement (https://www.mdpi.com/1999-4907/6/5/1696)
Supplement: s2 [file s2]

Criteria for collaborative management and valuation of ecosystem services of the Serra d’Espadà Natural Park


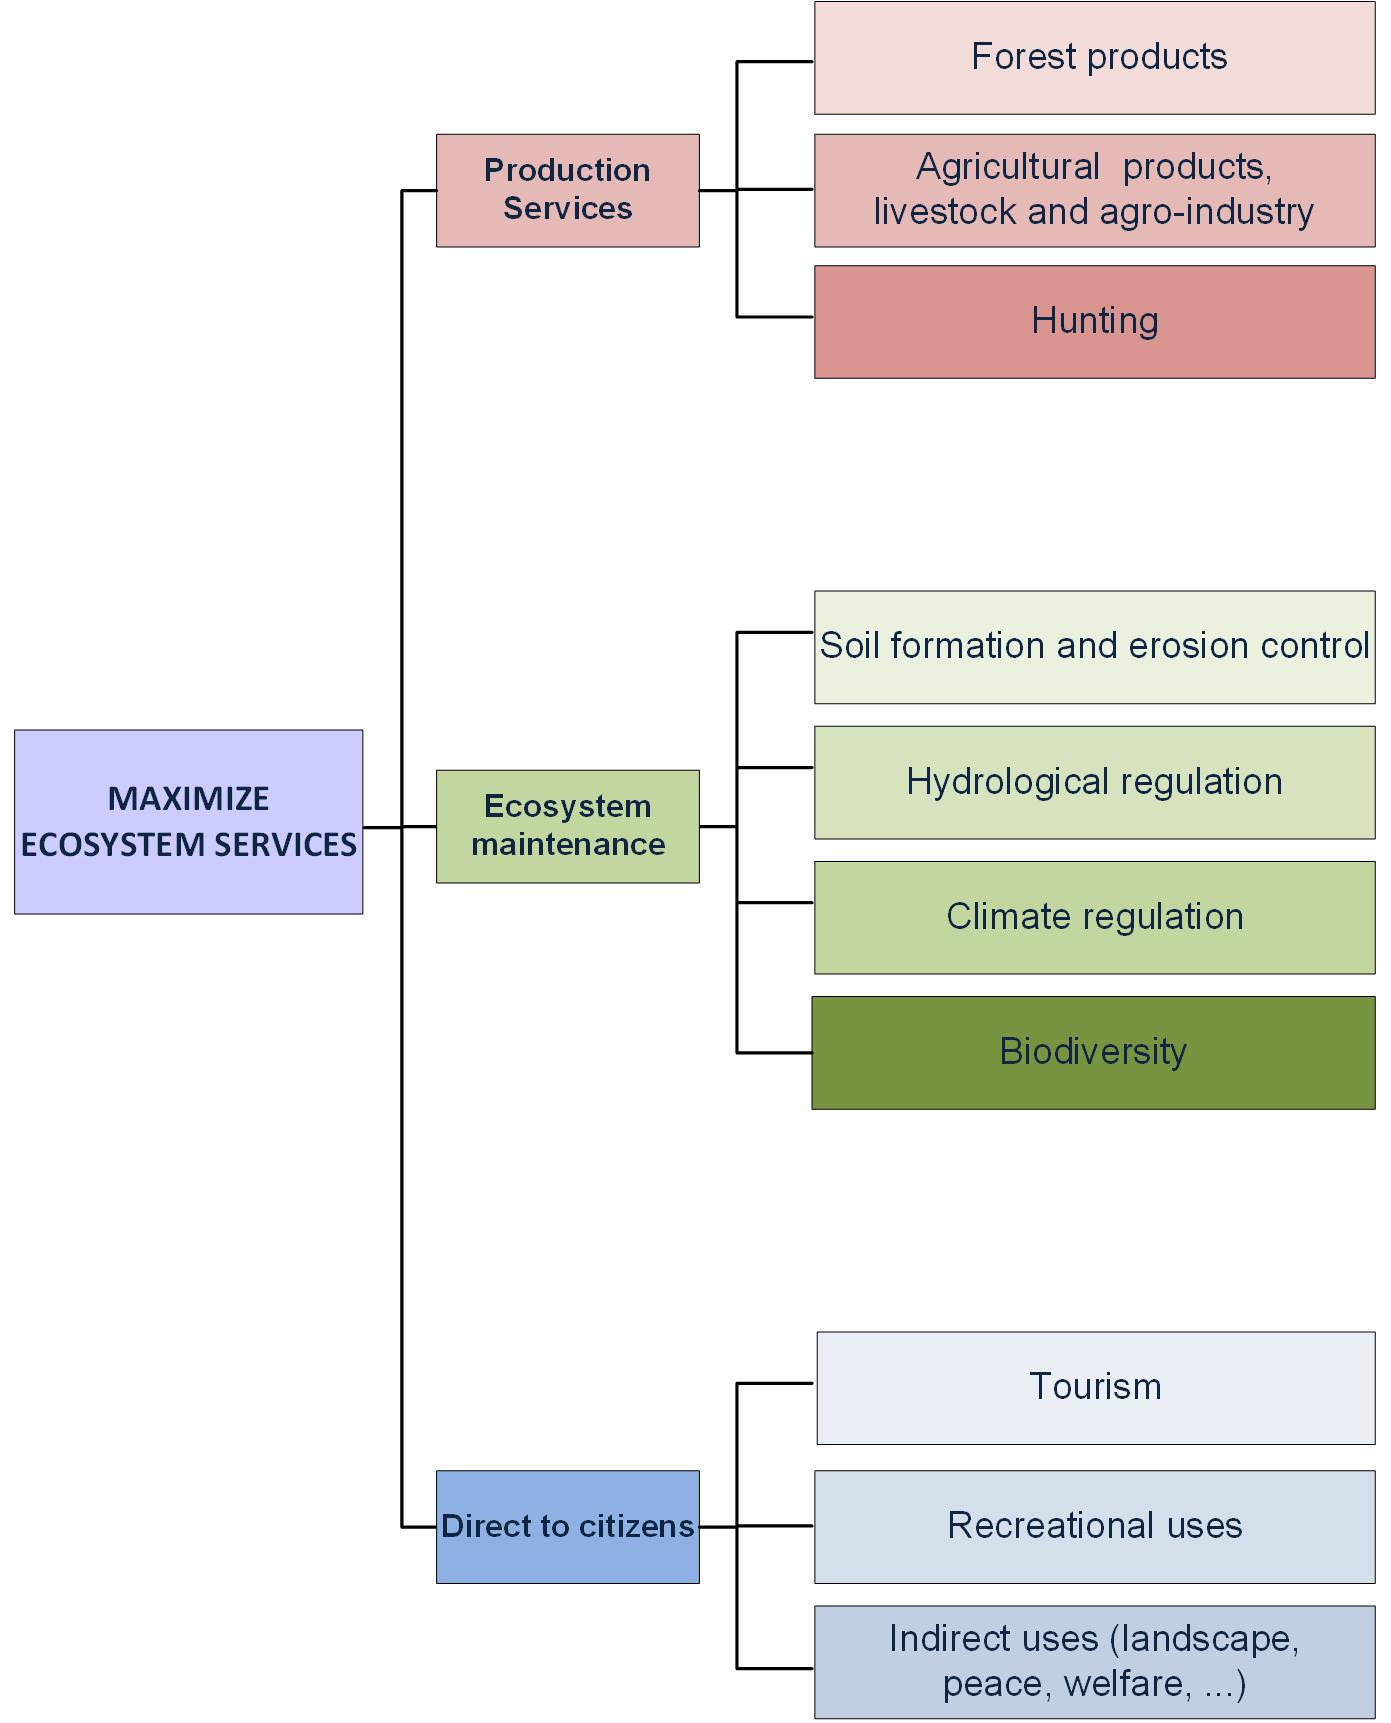


The survey was performed by pairwise comparison of the elements of the previous hierarchy. We will use the following scale of comparisons.

| **Importance or contribution of one criterion versus another** | **Definition** | **Explanation** |
| --- | --- | --- |
| **1** | **Equal importance** | Two activities equally contribute to the objective. |
| **2** | **Weak importance** | Intermediate importance between 1 and 3 |
| **3** | **Moderate importance** | Experience and judgement slightly in favour of one activity over another |
| **4** | **Moderate /strong** | Intermediate importance between 3 and 5 |
| **5** | **Strong importance** | Experience and judgement strongly in favour one activity over another |
| **6** | **Strong /very strong** | Intermediate importance between 5 and 7 |
| **7** | **Very strong or demonstrated importance** | An activity is strongly favoured and its dominance demonstrated in practice. |
| **8** | **Very, very strong** | Intermediate importance between 7 and 9 |
| **9** | **Extreme importance** | The evidence favouring one activity over another is of the highest possible order of affirmation |

With regard to the overall objective of **maximizing** **ecosystem services,** which one of the following objectives should be more important on a scale of 1 to 9?


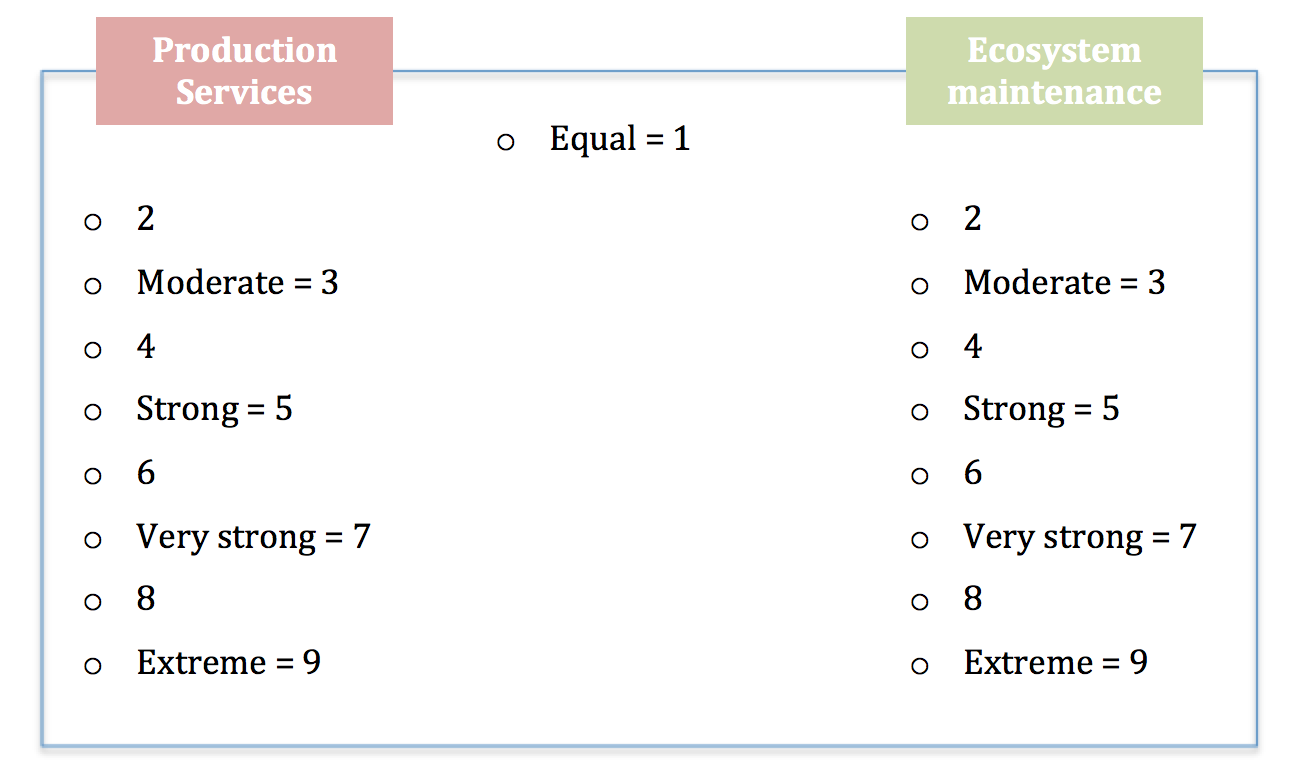


With regard to the overall objective of **maximizing** **ecosystem services,** which one of the following objectives should be more important on a scale of 1 to 9?


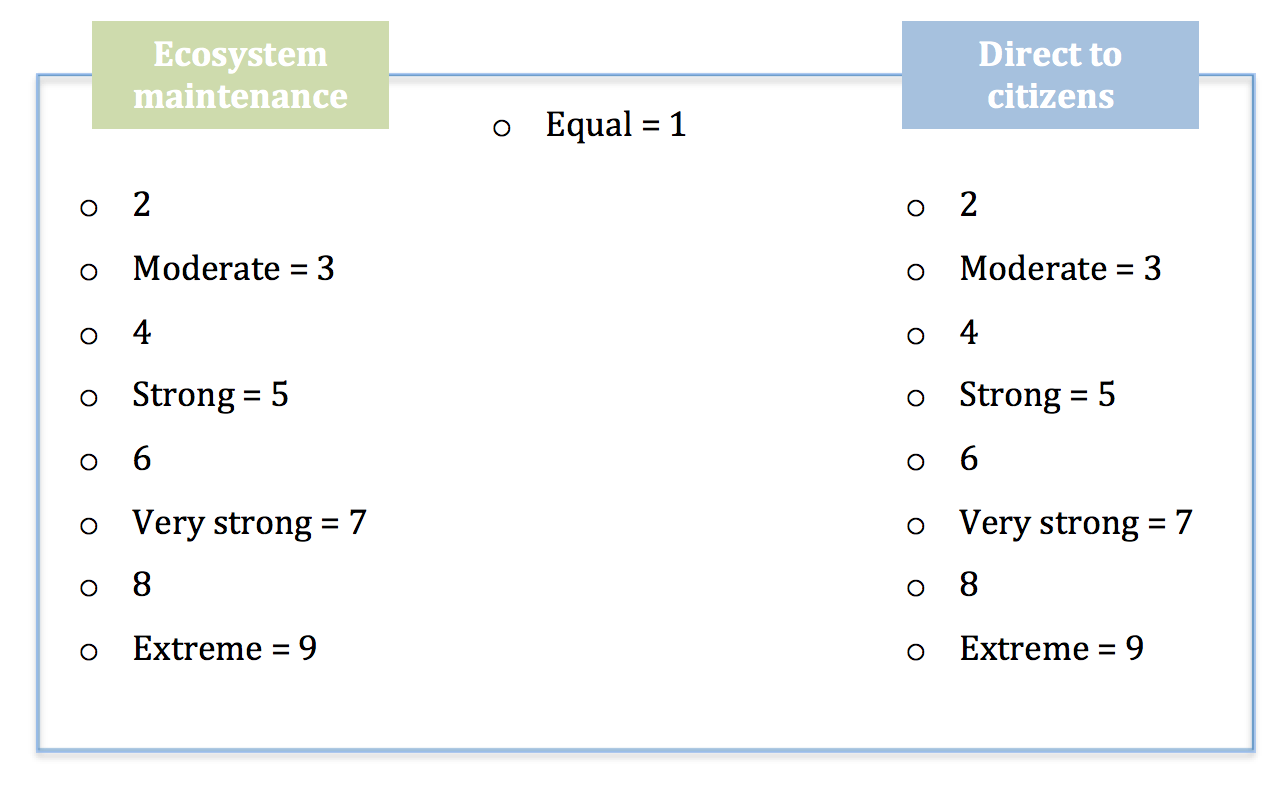


With regard to the overall objective of **maximizing** **ecosystem services,** which one of the following objectives should be more important on a scale of 1 to 9?


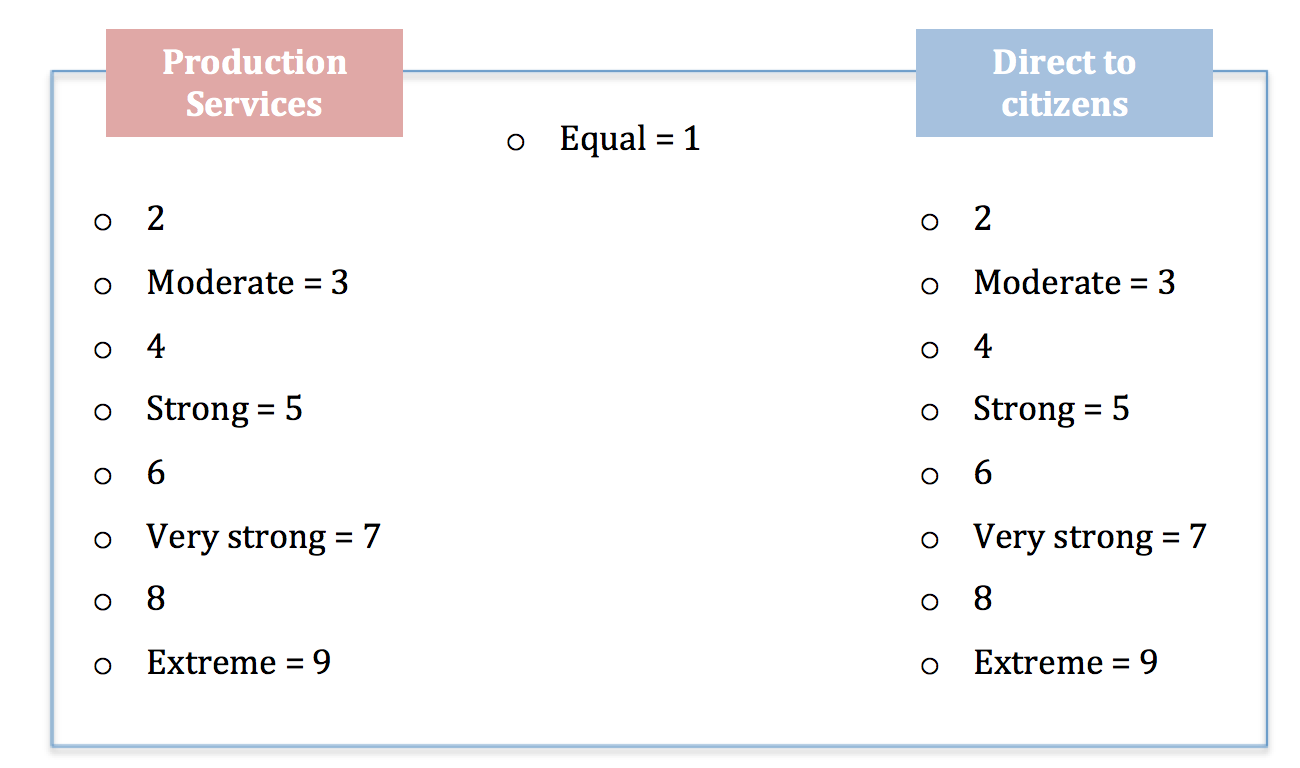


With regard to the objective of **maximizing** **production services,** which one of the following objectives should be more important on a scale of 1 to 9?


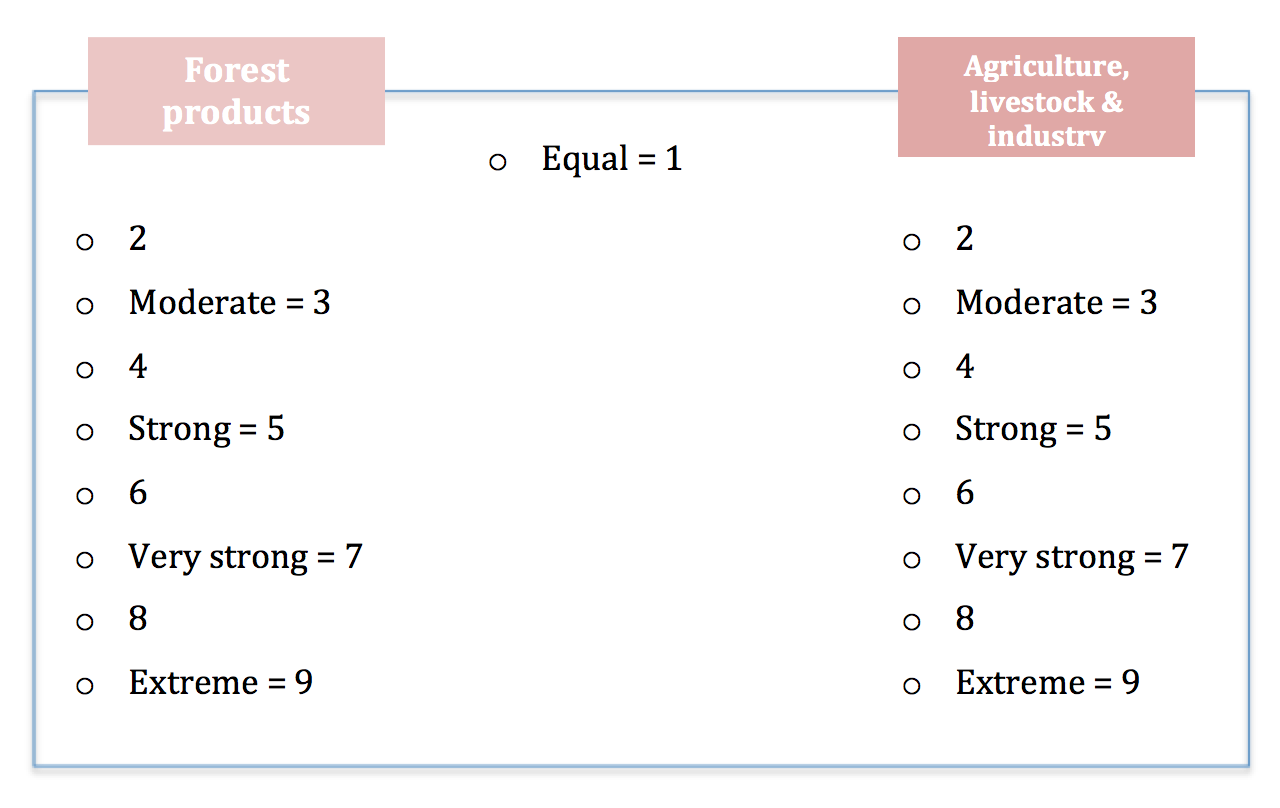


With regard to the objective of **maximizing** **production services,** which one of the following objectives should be more important on a scale of 1 to 9?


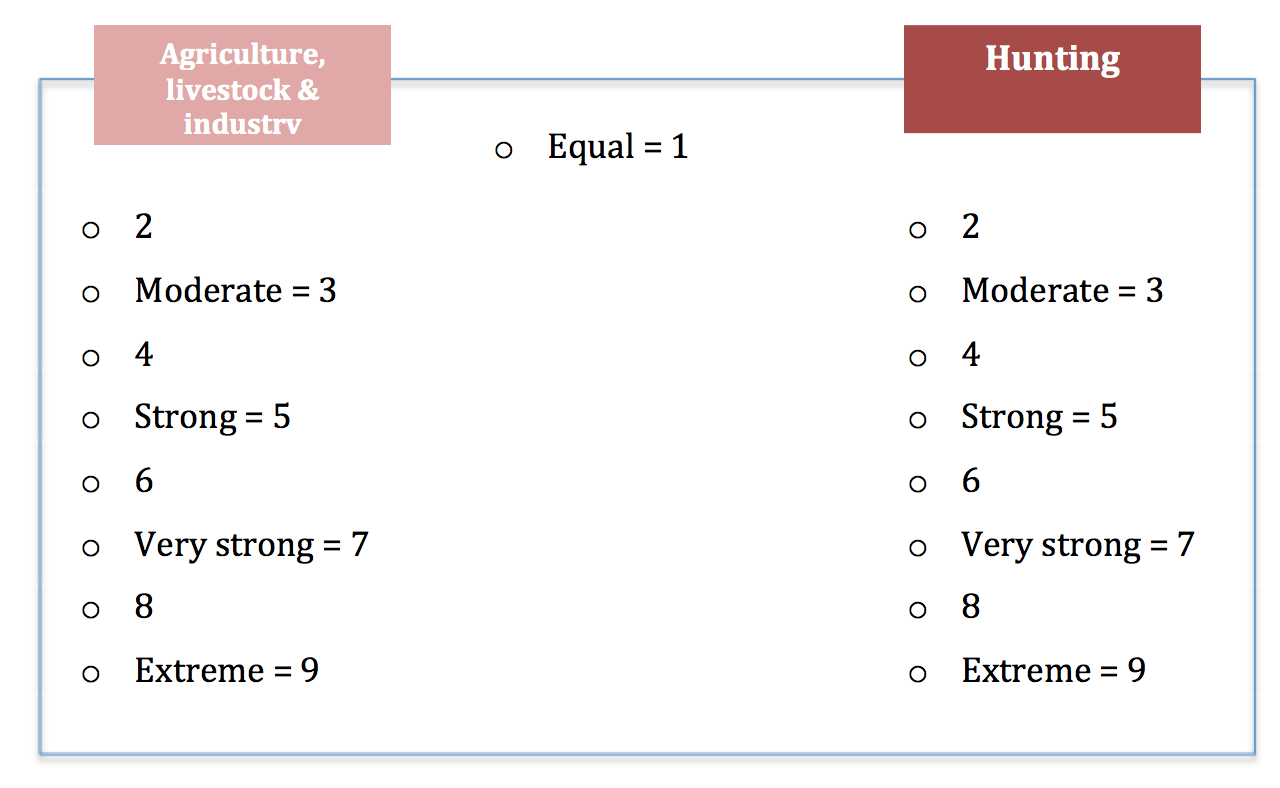


With regard to the objective of **maximizing** **production services,** which one of the following objectives should be more important on a scale of 1 to 9?


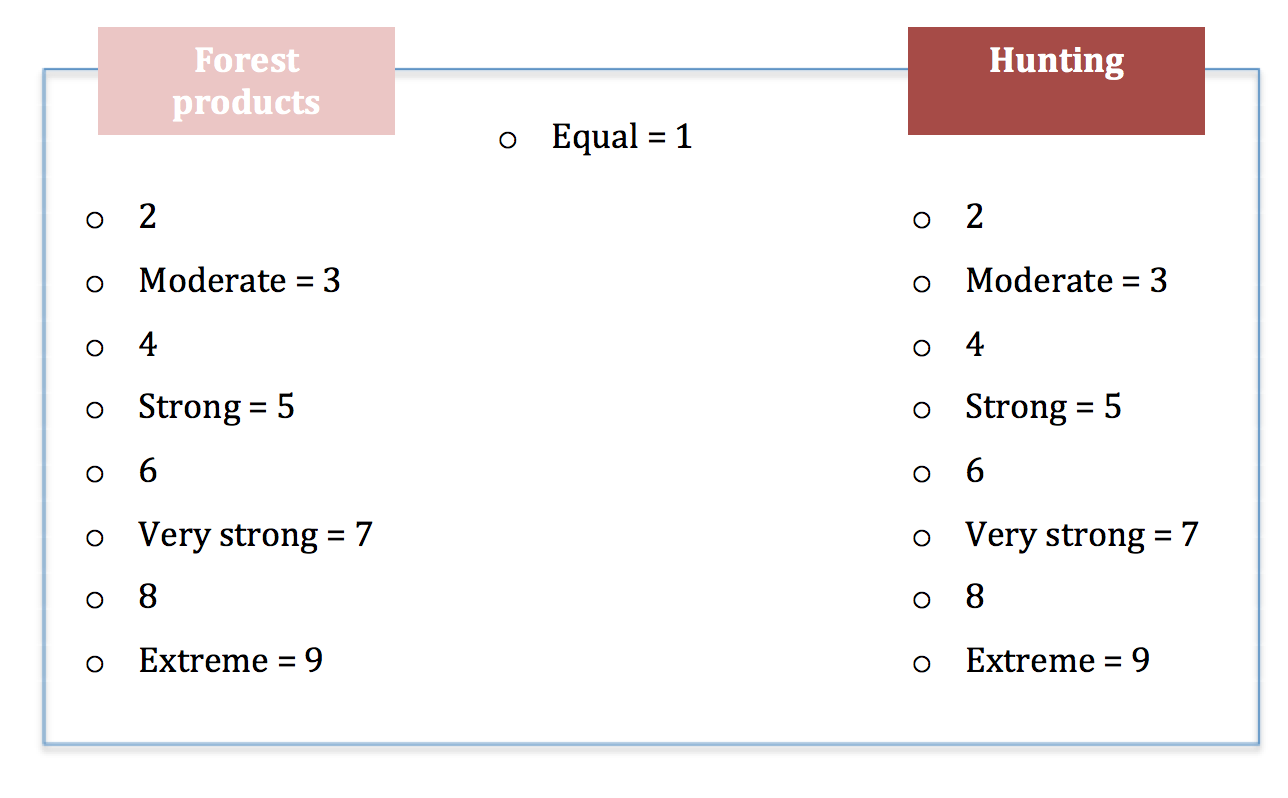


With regard to the objective of **maximizing** **ecosystem maintenance services,** which one of the following objectives should be more important on a scale of 1 to 9?


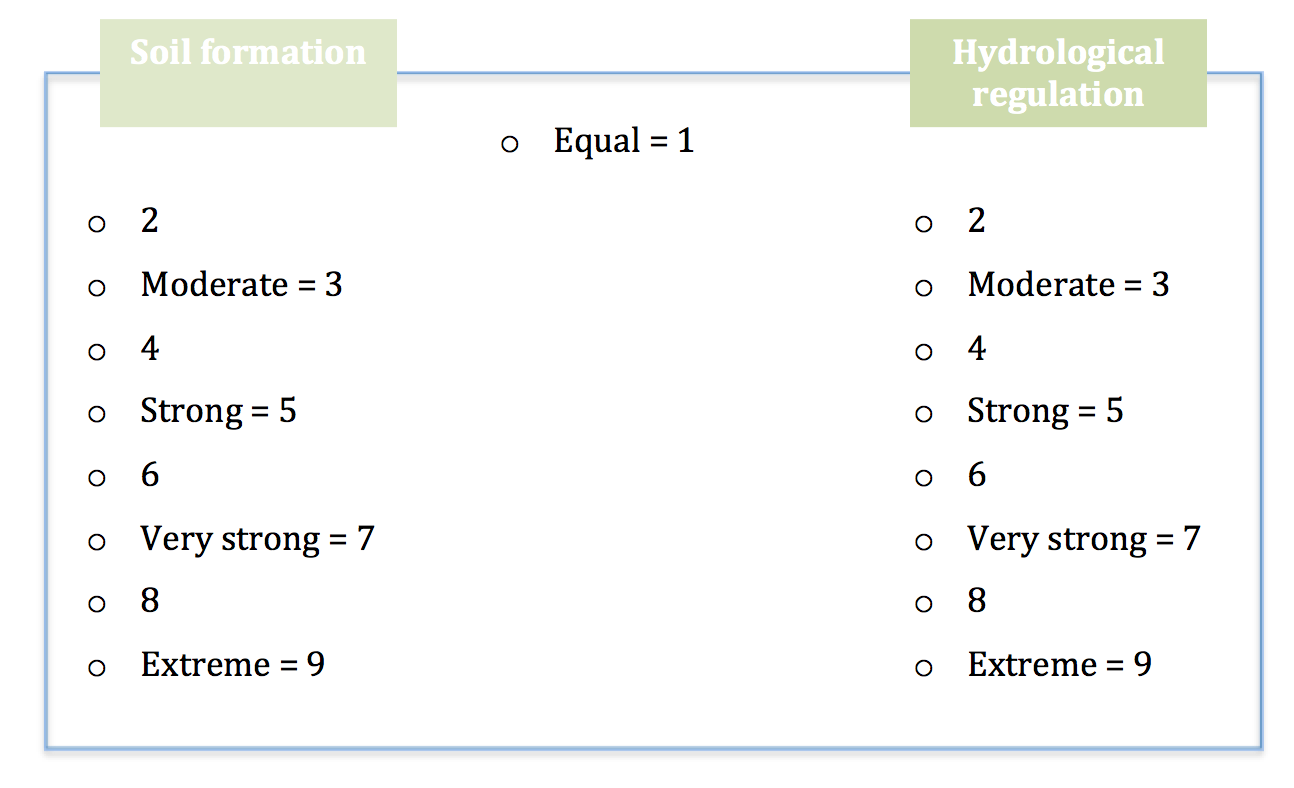


**Soil formation & Erosion Control**

With regard to the objective of **maximizing** **ecosystem maintenance services,** which one of the following objectives should be more important on a scale of 1 to 9?


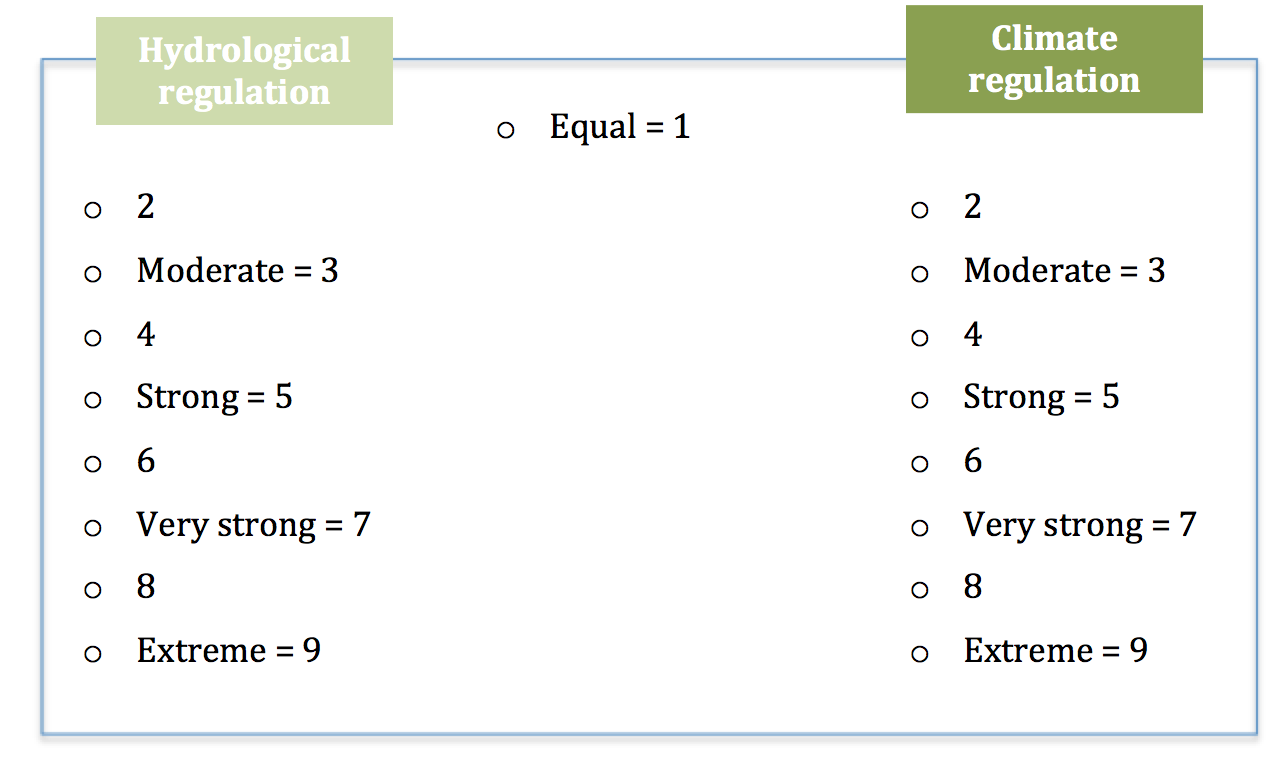


With regard to the objective of **maximizing** **ecosystem maintenance services,** which one of the following objectives should be more important on a scale of 1 to 9?


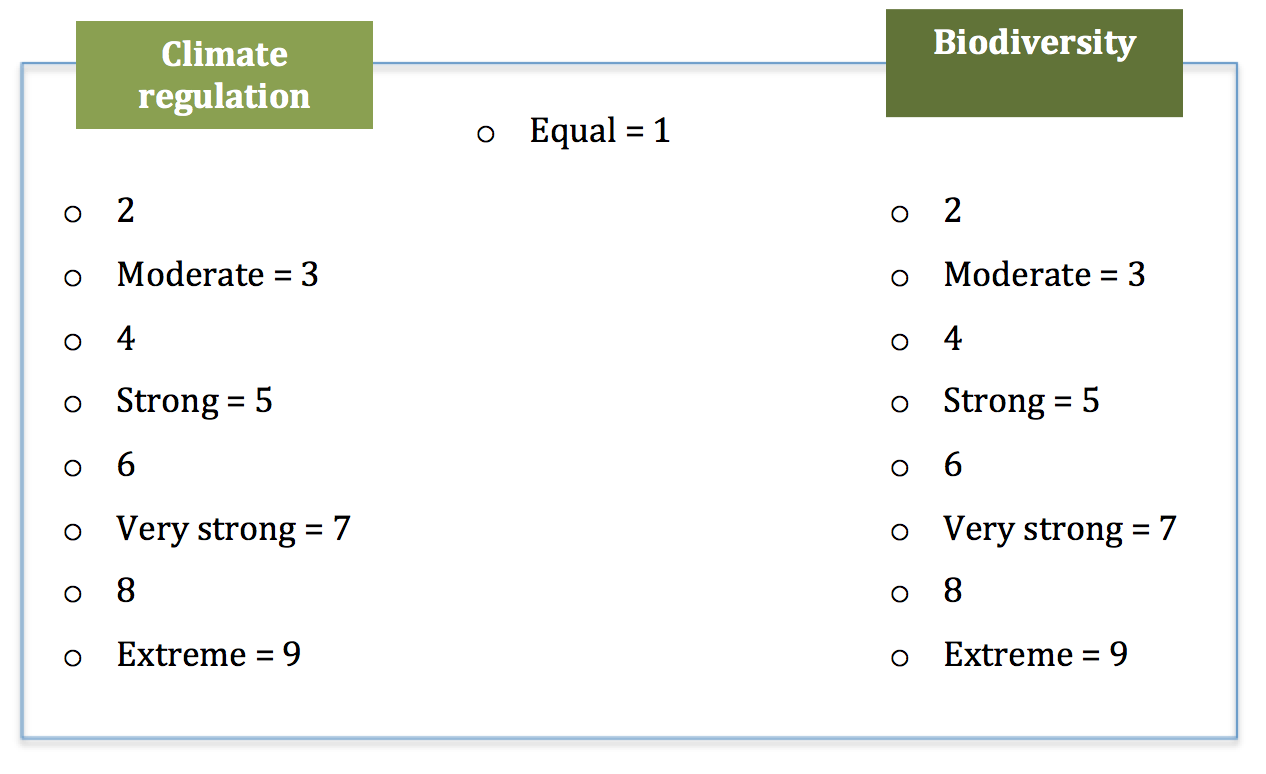


With regard to the objective of **maximizing** **ecosystem maintenance services,** which one of the following objectives should be more important on a scale of 1 to 9?


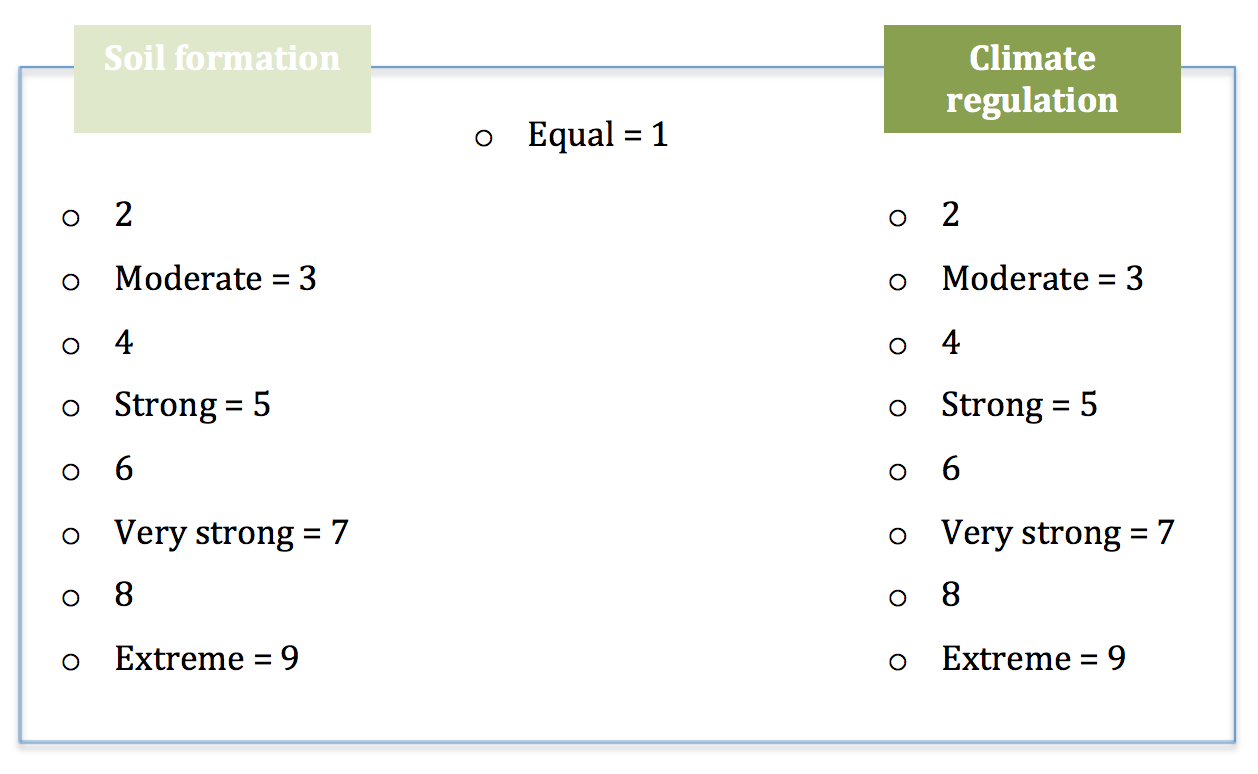


**Soil formation & Erosion Control**

With regard to the objective of **maximizing** **ecosystem maintenance services,** which one of the following objectives should be more important on a scale of 1 to 9?


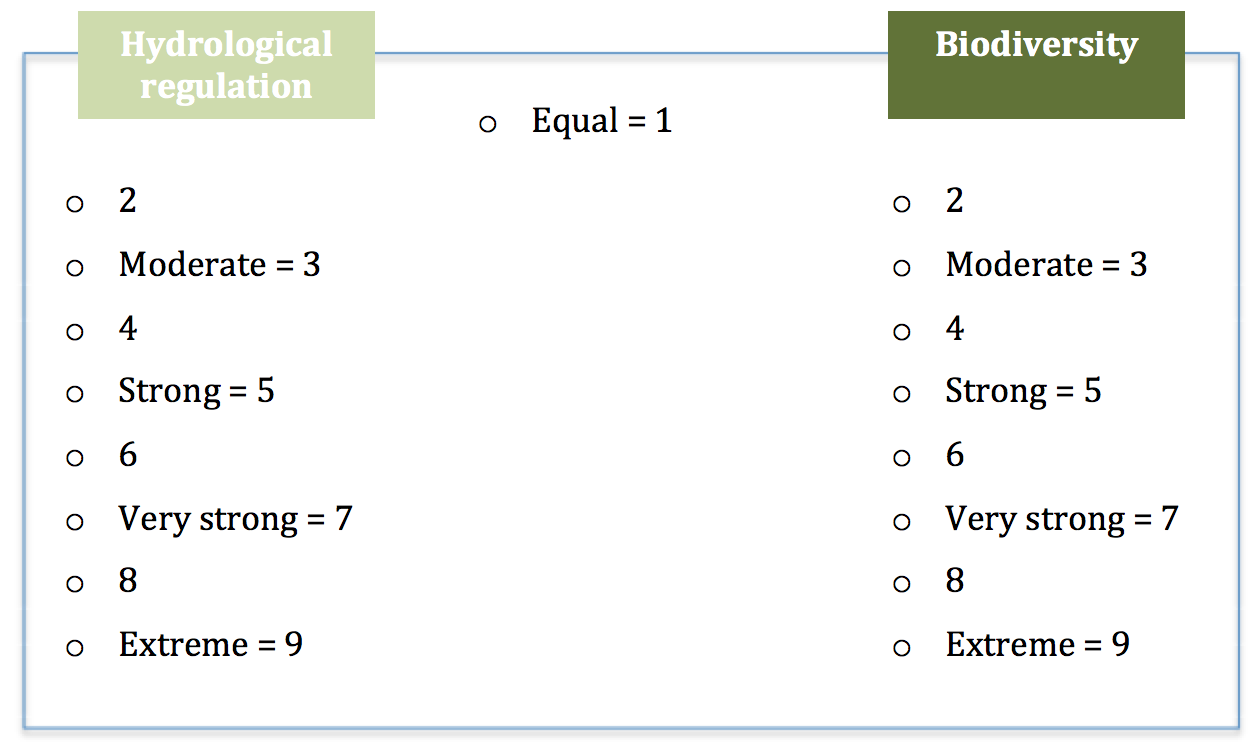


With regard to the objective of **maximizing** **ecosystem maintenance services,** which one of the following objectives should be more important on a scale of 1 to 9?


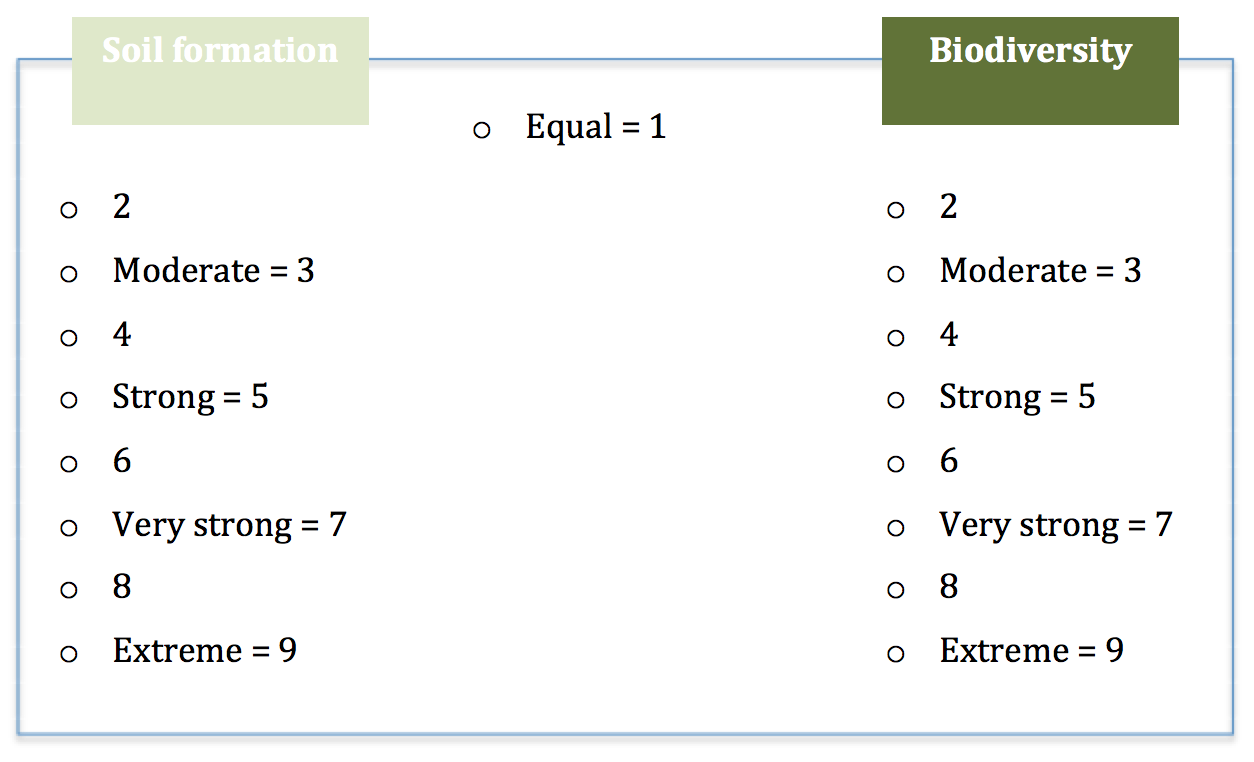


**Soil formation & Erosion Control**

With regard to the objective of **maximizing** **direct to citizens services,** which one of the following objectives should be more important on a scale of 1 to 9?


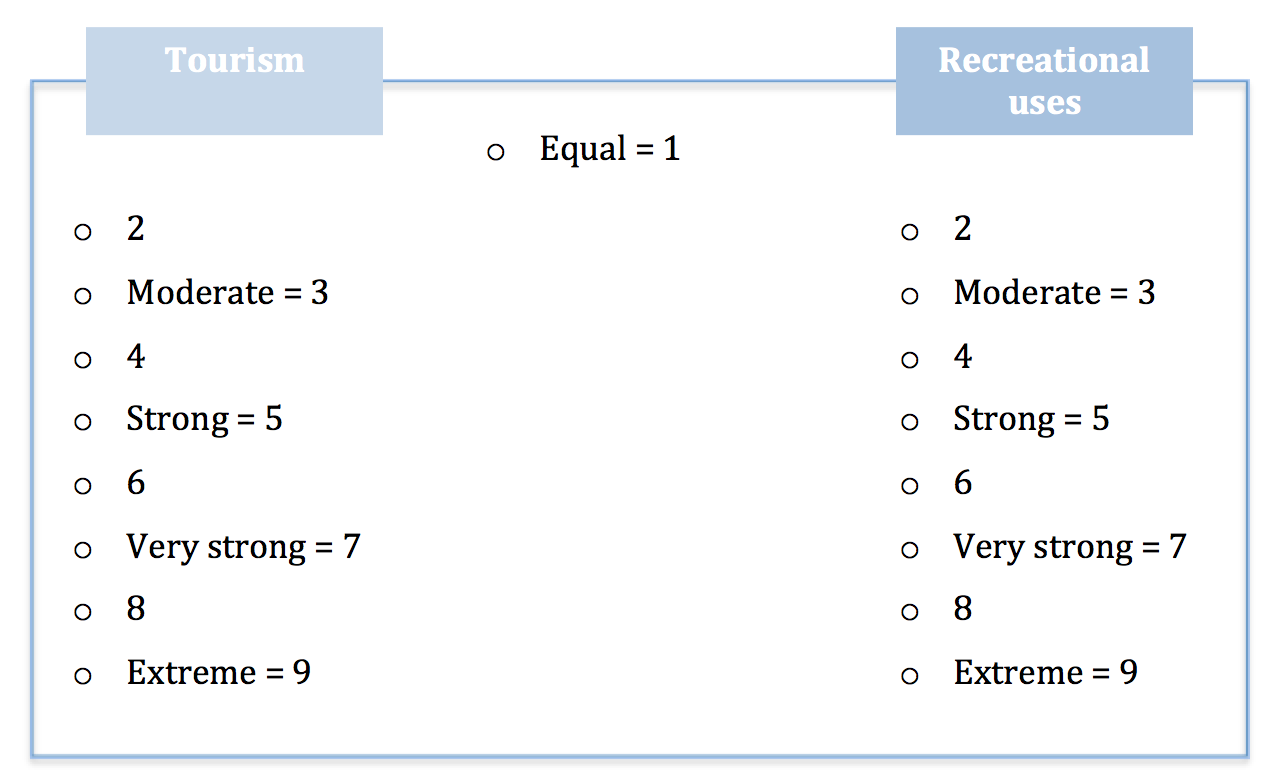


With regard to the objective of **maximizing** **ecosystem maintenance services,** which one of the following objectives should be more important on a scale of 1 to 9?


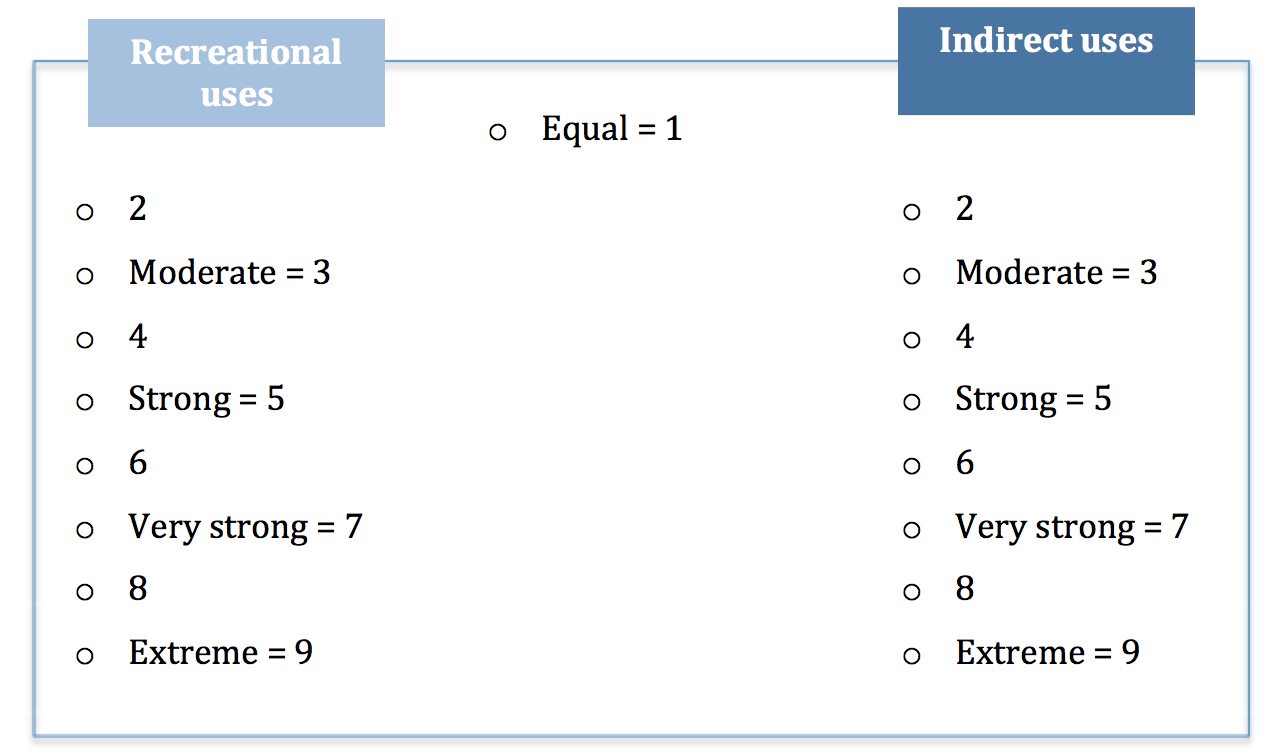


With regard to the objective of **maximizing** **ecosystem maintenance services,** which one of the following objectives should be more important on a scale of 1 to 9?


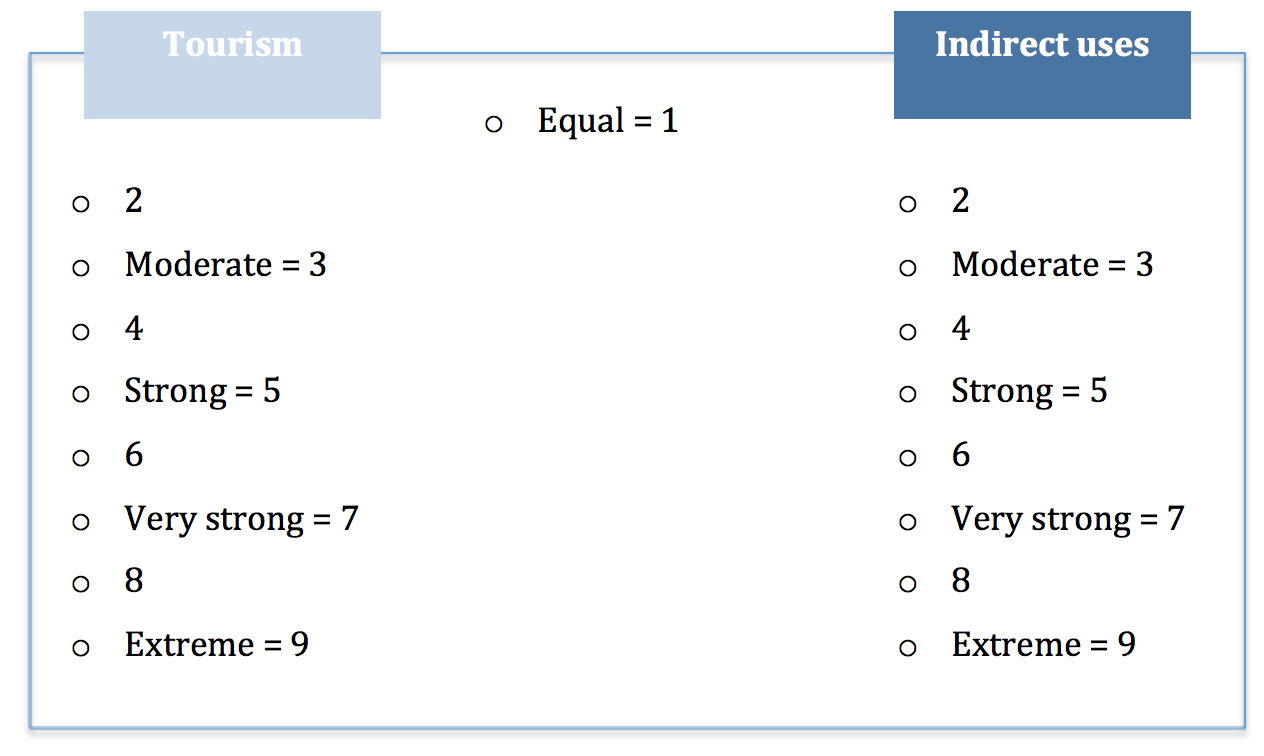


**Comments and/or recommendations:**
